# Supplementary material for: S-15176 Difumarate Salt Can Impair Mitochondrial Function through Inhibition of the Respiratory Complex III and Permeabilization of the Inner Mitochondrial Membrane
Source: MDPI journal article supplement (doi:10.3390/biology11030380), 2022-02-27
Supplement: s1 [file s1]

## Supplementary Materials

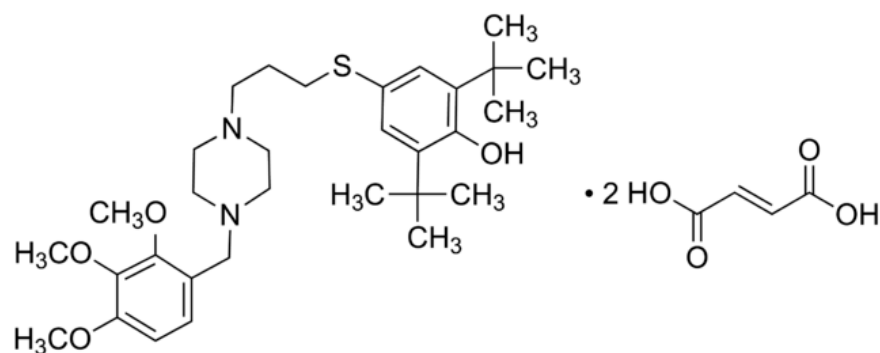

**Figure S1.** Structural formula of S-15176 N-[(3,5-Di-tert-butyl-4-hydroxy-1-thiophenyl)]-3-propyl-N'-(2,3,4-trimethoxybenzyl)piperazine difumarate salt.

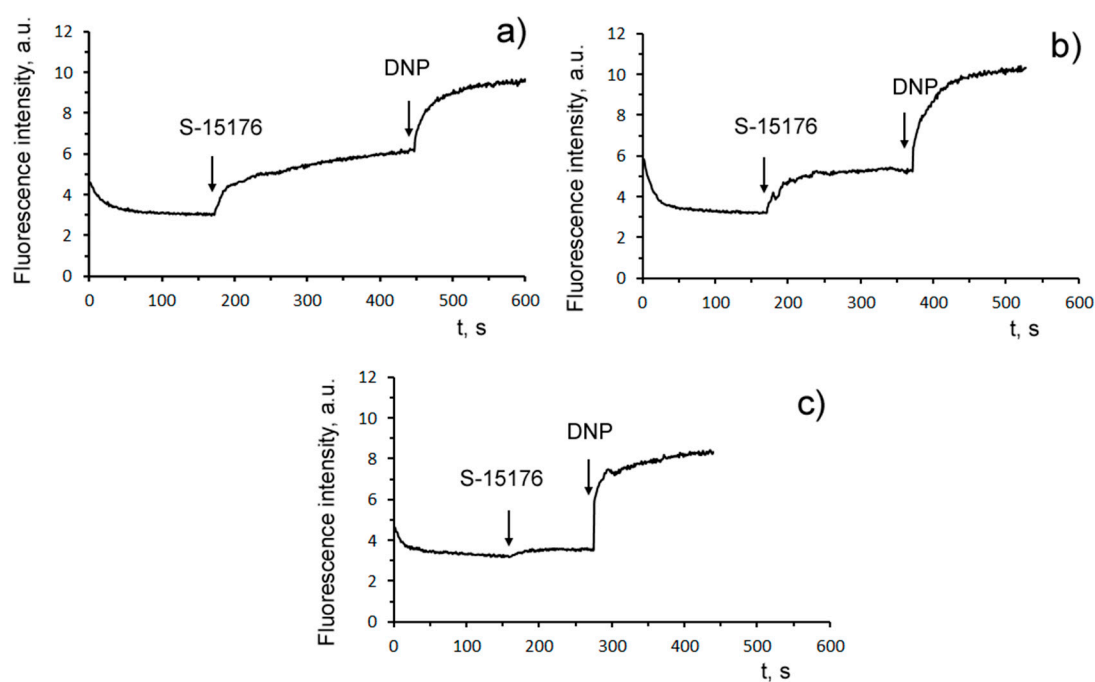

**Figure S2.** Representative recordings of changes in the fluorescence intensity of safranin O, which reveal S-15176-induced depolarization of isolated rat liver mitochondria energized by the complex I substrates (2.5 mM potassium glutamate + 2.5 mM malate) (a), the complex II substrate (5 mM potassium succinate in the presence of 1  $\mu$ M rotenone) (b), or the complex IV substrates (5 mM ascorbic acid + 0.2 mM TMPD) (c). Additions: 30  $\mu$ M S-15176, 50  $\mu$ M DNP. The mitochondrial membrane potential was evaluated with safranin O as described in the Materials and Methods section. Typical traces are shown ( $n = 5$ ).
